# Supplementary material for: Molecular-scale insights into confined clindamycin in nanoscale pores of mesoporous silica
Source: Royal Society of Chemistry journal article supplement (doi:10.1039/d3cp02596a), 2023-01-01
Supplement: d3cp02596a1.pdf [file d3cp02596a1.pdf]

## Supporting Information

**Table S1.** Force field parameters for the silica model<sup>1</sup>.

| atom                        | $\sigma$ (nm)                  | $\epsilon$ (kJ/mol) | q (e)  |
|-----------------------------|--------------------------------|---------------------|--------|
| Si                          | 0.33020                        | 0.0000077           | 1.24   |
| <sup>a</sup> O <sub>b</sub> | 0.31656                        | 0.65000             | -0.620 |
| O                           | 0.31656                        | 0.65000             | -0.710 |
| H                           | 0.12950                        | 0.00155             | 0.400  |
| angle                       | $k$ (kJ/mol/rad <sup>2</sup> ) |                     | (deg)  |
| Si-O-H                      | 104.2314                       |                     | 118.5  |
| HO-Si-OH                    | 159.7196                       |                     | 118.5  |

<sup>a</sup>O<sub>b</sub> indicates a bridging, or siloxane, oxygen.

**Table S1.** Force field parameters for the TIP4P<sup>2,3</sup>.

| atom            | $\sigma$ (nm) | $\epsilon$ (kJ/mol) | q (e) |
|-----------------|---------------|---------------------|-------|
| OW              | 0.31589       | 0.77490             | 0.0   |
| HW1             | -             | -                   | 0.52  |
| HW2             | -             | -                   | 0.52  |
| <sup>b</sup> MW | -             | -                   | -1.04 |

<sup>a</sup>MW represents the virtual atom of a water molecule to improve the accuracy.

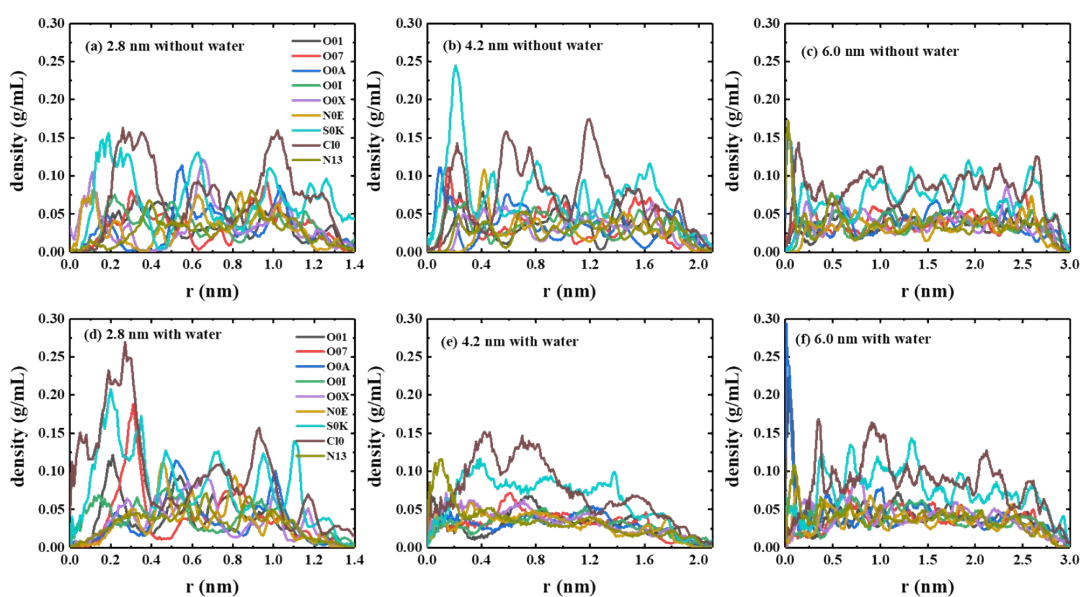

**Figure S1** Atomic density profiles of clindamycin as a function of the distance from

pore surface to pore center in the system with different pore sizes without (a-c) and with (d-f) water.

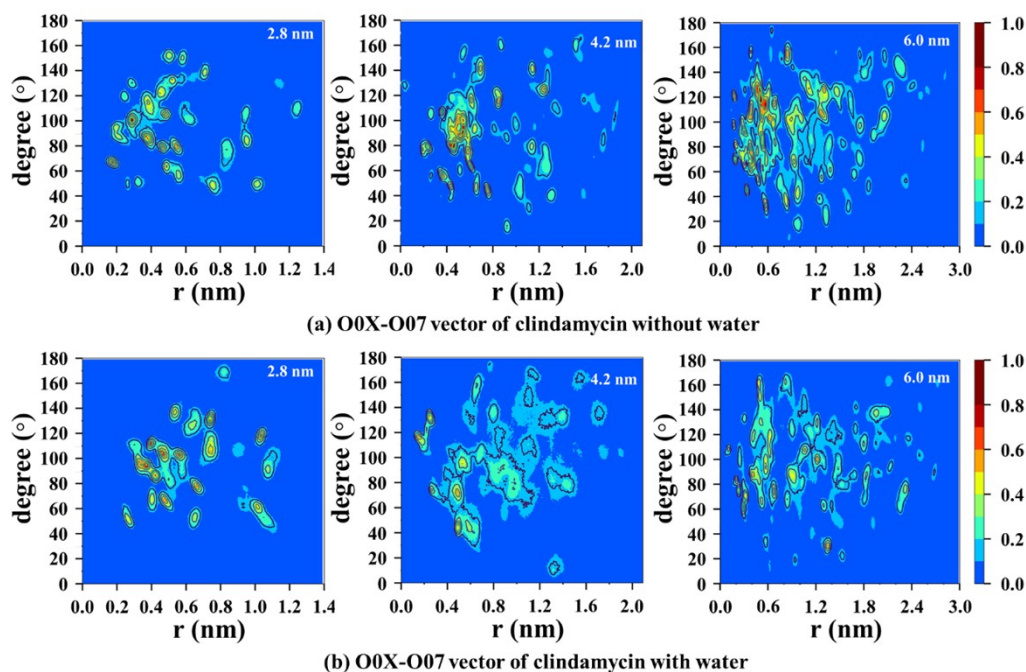

**Figure S2** The orientational distribution with the angle between the O0X-O07 vector and pore center axis along the z direction as a function of the distance (r) between the special parts of the clindamycin and the nearest O atom of the silanol groups on pore surface of different mesoporous silica systems without (a) and with water (b).

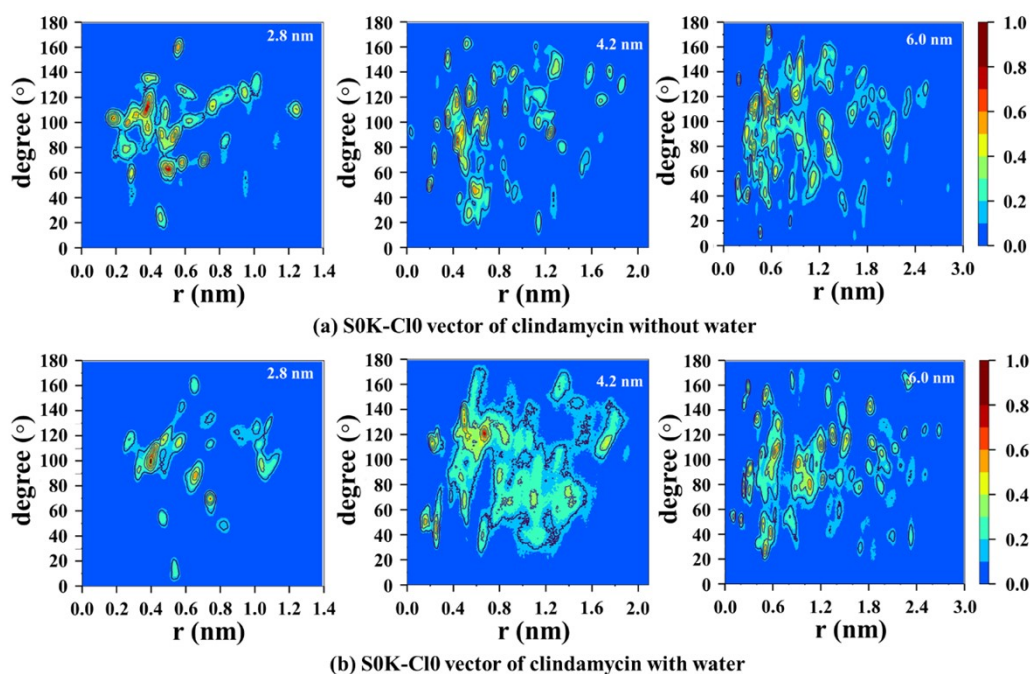

**Figure S3** The orientational distribution with the angle between the S0K-C10 vector and pore center axis along the z direction as a function of the distance (r) between the special parts of the clindamycin and the nearest O atom of the silanol groups on pore surface of different mesoporous silica systems without (a) and with water (b).

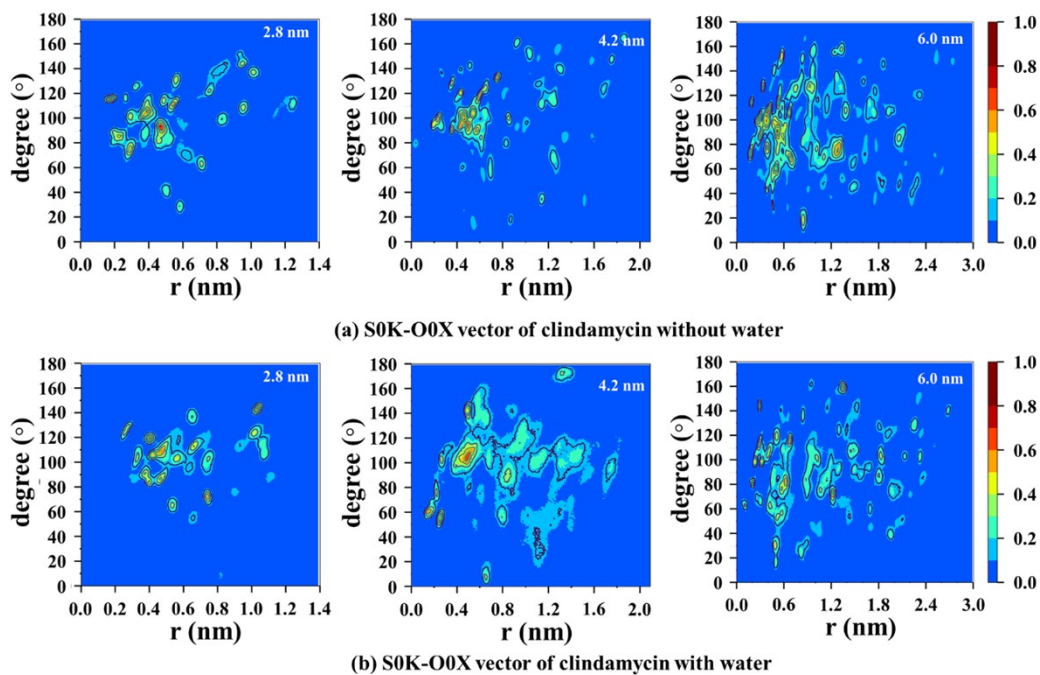

**Figure S4** The orientational distribution with the angle between the S0K-O0X vector and pore center axis along the  $z$  direction as a function of the distance ( $r$ ) between the special parts of the clindamycin and the nearest O atom of the silanol groups on pore surface of different mesoporous silica systems without (a) and with water (b).

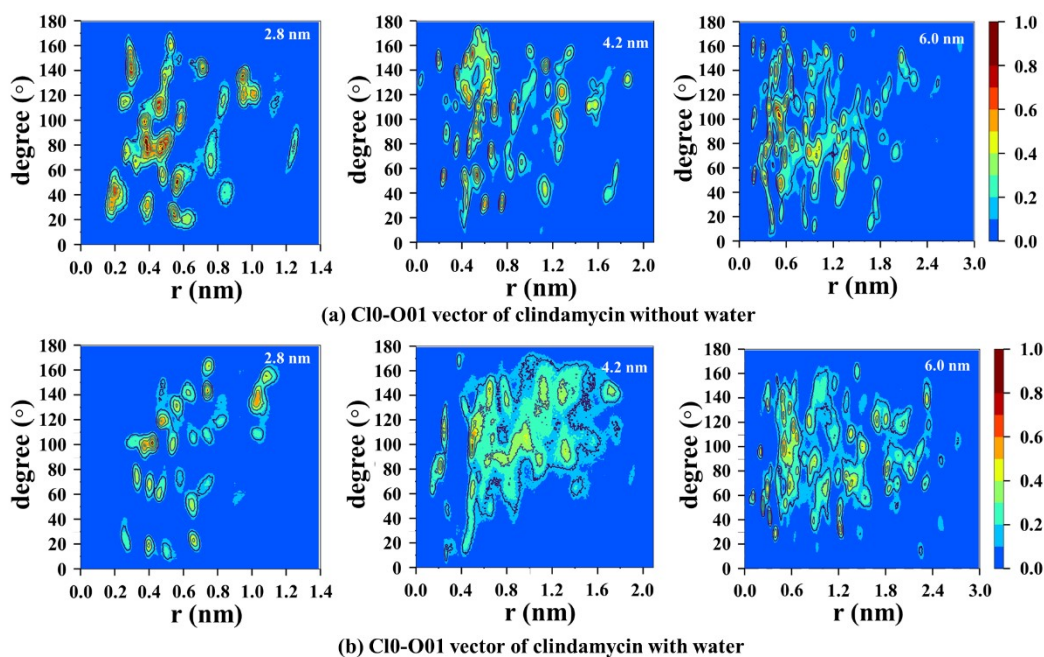

**Figure S5** The orientational distribution with the angle between the C10-O01 vector and pore center axis along the  $z$  direction as a function of the distance ( $r$ ) between the special parts of the clindamycin and the nearest O atom of the silanol groups on pore surface of different mesoporous silica systems without (a) and with water (b).

1. Zheng, W.; Zhao, L.; Sun, W.; Qian, F., Understanding the Confinement Effects and Dynamics of Methylimidazole in Nanoscale Silica Pores. *The Journal of Physical Chemistry C* **2021**, *125* (13), 7421-7430.
2. Abascal, J. L. F.; Vega, C., A general purpose model for the condensed phases of water: TIP4P/2005. *The Journal of Chemical Physics* **2005**, *123* (23), 234505.
3. Harrach, M. F.; Drossel, B., Structure and dynamics of TIP3P, TIP4P, and TIP5P water near smooth and atomistic walls of different hydroaffinity. *J Chem Phys* **2014**, *140* (17), 174501.
